# Supplementary material for: Sensitive determination of trace Cd(ii) and Pb(ii) in soil by an improved stripping voltammetry method using two differentin situplated bismuth-film electrodes based on a novel electrochemical measurement system
Source: Royal Society of Chemistry journal article supplement (doi:10.1039/c7ra12767g), 2018-01-01
Supplement: c7ra12767g1.pdf [file c7ra12767g1.pdf]

**Sensitive determination of trace Cd(II) and Pb(II) in soil by an improved stripping voltammetry method using two different in-situ plated bismuth-film electrodes based on a novel electrochemical measurement system**

Guo Zhao<sup>a,b</sup>, Hui Wang<sup>a,b</sup>, Gang Liu<sup>a,b,\*</sup>

<sup>a</sup>Key Lab of Modern Precision Agriculture System Integration Research, Ministry of Education of China, China Agricultural University, Beijing 100083 P.R. China

<sup>b</sup>Key Lab of Agricultural Information Acquisition Technology, Ministry of Agricultural of China, China Agricultural University, Beijing 100083 P.R. China

**\*Corresponding author:** Tel.: +86 010 62736741; fax: +86 010 62736741.

E-mail address: [pac@cau.edu.cn](mailto:pac@cau.edu.cn) (G. Liu)

**Fig. S1.** Micro-electrolytic cell with (A) the first combined electrode composed of the GCPE working electrode, a Ag/AgCl reference electrode and a Pt-wire counter electrode and (B) the second combined electrode composed of the MWCNT-Nafion/GCE working electrode, a Ag/AgCl reference electrode and a Pt-wire counter electrode.

**Fig. S2.** (a) SWASV of 20  $\mu\text{g/L}$  Cd(II) and Pb(II) in 20 mL of acetate buffer solution (0.1 M, pH 4.5) at the GCE and Bi/GCE. (b) Stripping current measurements of 20  $\mu\text{g/L}$  Cd(II) and Pb(II) on the Bi/GCE in 0.1 M acetate buffer solution (pH 5.0). The insets correspond to data collected from every SWASV response over eight repetitions. RSD: relative standard deviation; deposition time: 140 s; deposition potential: -1.2 V; Bi(III) concentration: 600  $\mu\text{g/L}$ .

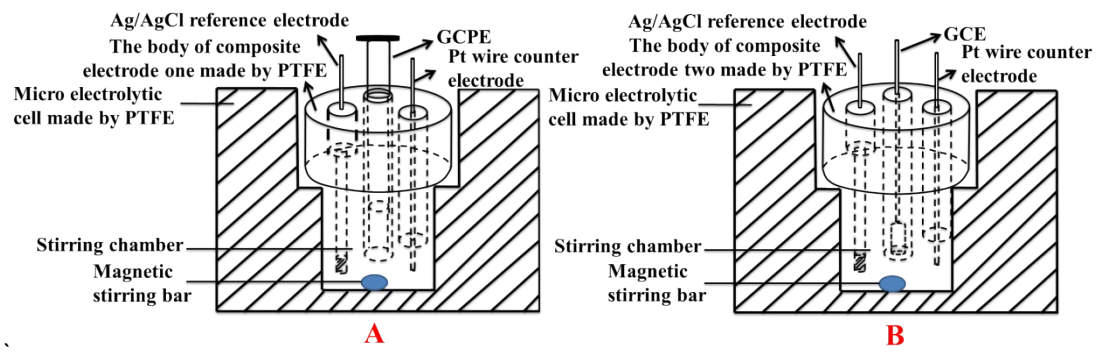

Fig. S1.

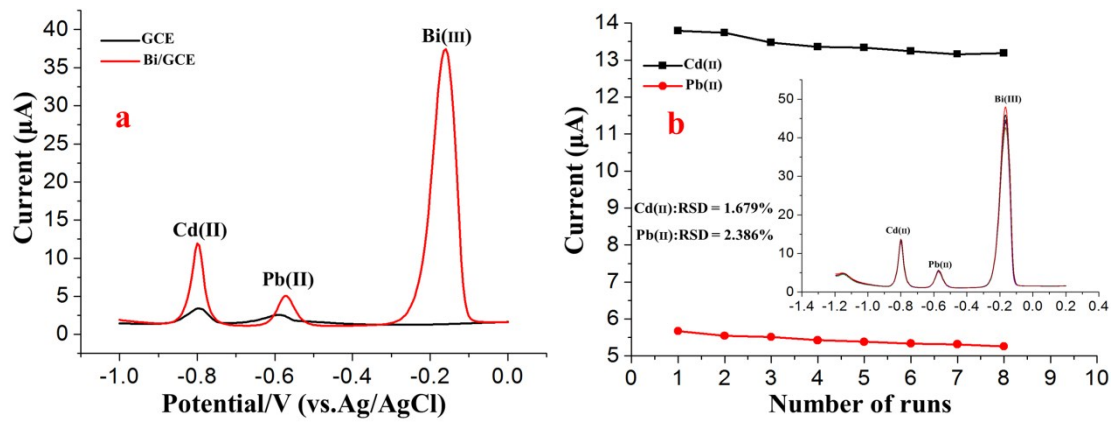

Fig. S2.
